# Supplementary material
Source: Springer Nature journal article supplement (https://www.springermedizin.de/resource/supplementary/12974_2011_356_MOESM4_ESM.pdf/9601500)

## BV.2 Microglia

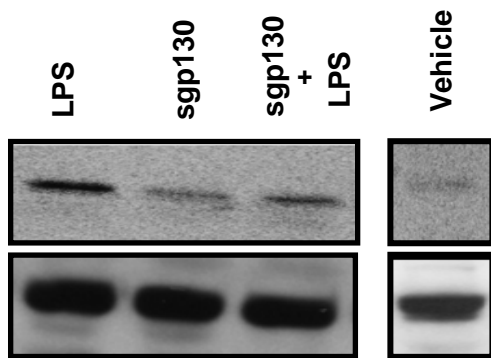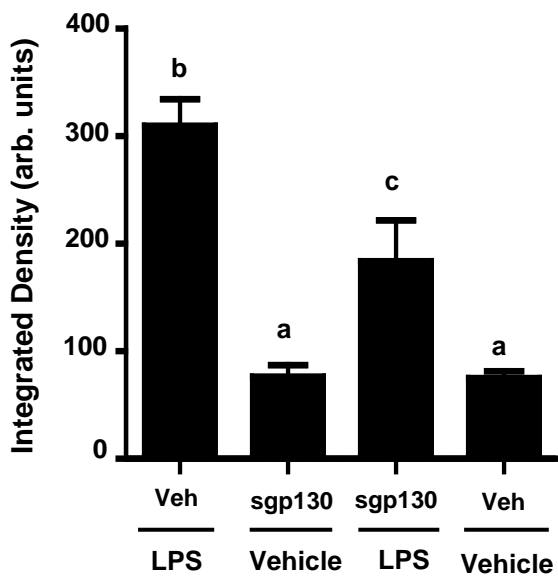

## Neuro.2A Neurons

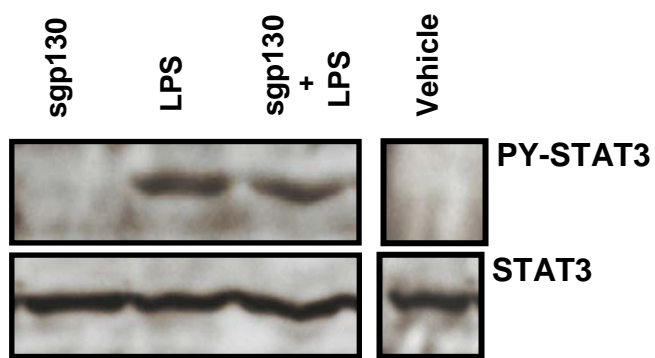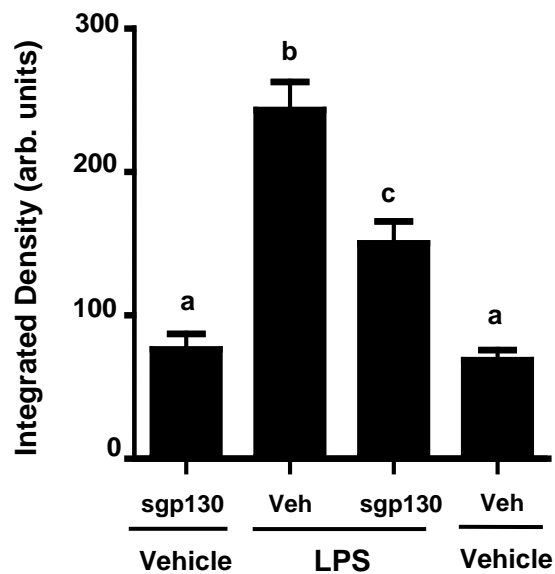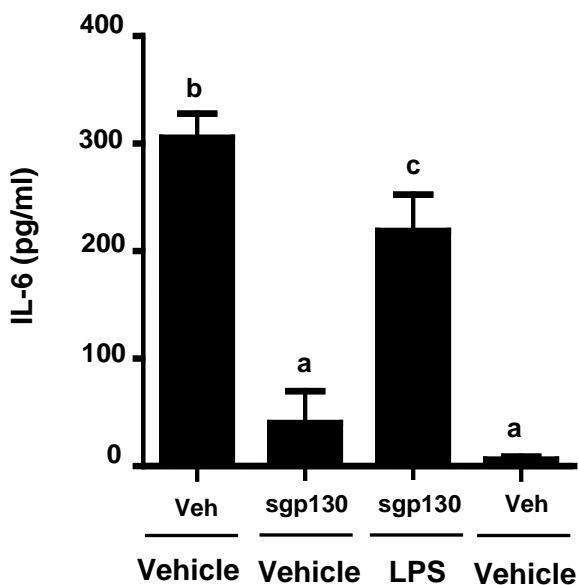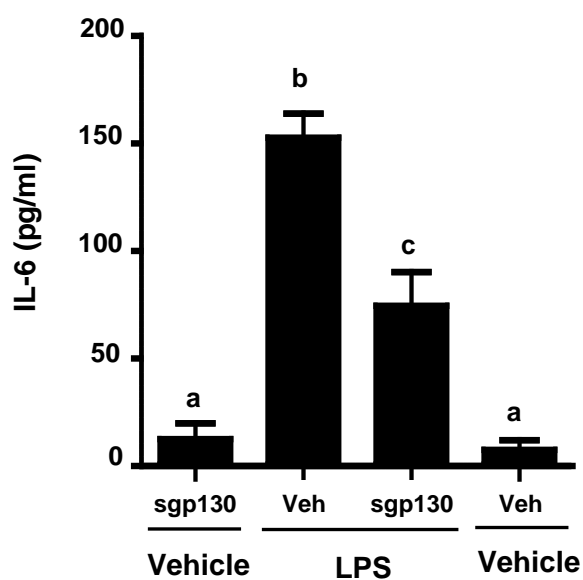

Supplement: MOESM4 [file 9601500]
